# Supplementary material for: Impacts of compound hot–dry extremes on US soybean yields
Source: Copernicus journal article supplement (doi:10.5194/esd-12-1371-2021), 2021-11-30
Supplement: Supplementary file 1 [file esd-12-1371-2021-supplement.pdf]

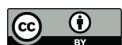

*Supplement of*

## **Impacts of compound hot–dry extremes on US soybean yields**

**Raed Hamed et al.**

*Correspondence to:* Raed Hamed (raed.hamed@vu.nl)

The copyright of individual parts of the supplement might differ from the article licence.

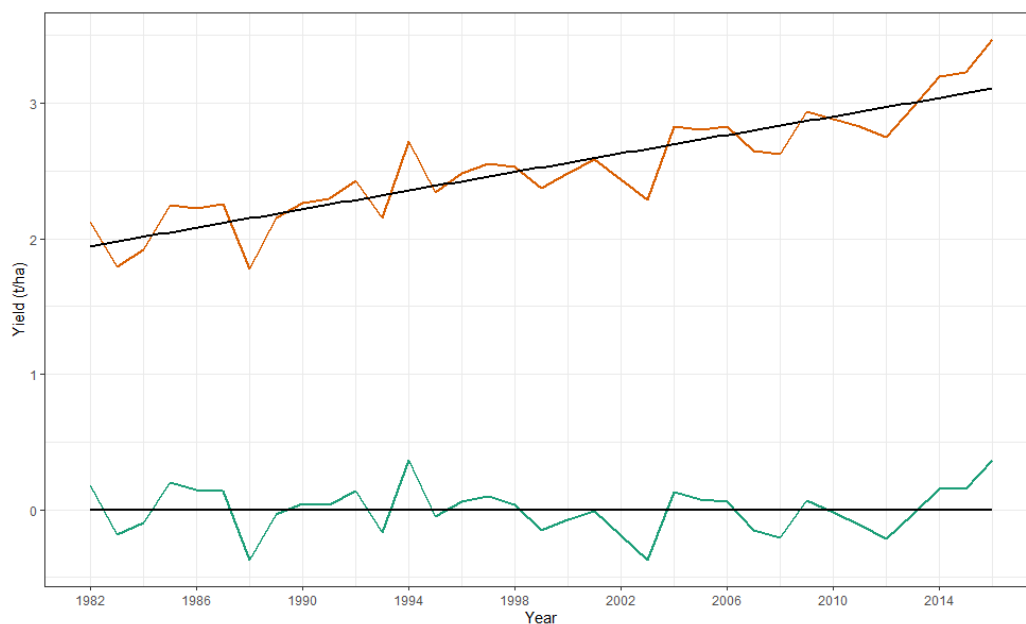

**Figure S 1. Raw averaged county-level yields (in orange) and linearly de-trended averaged county-level yields (in green).**

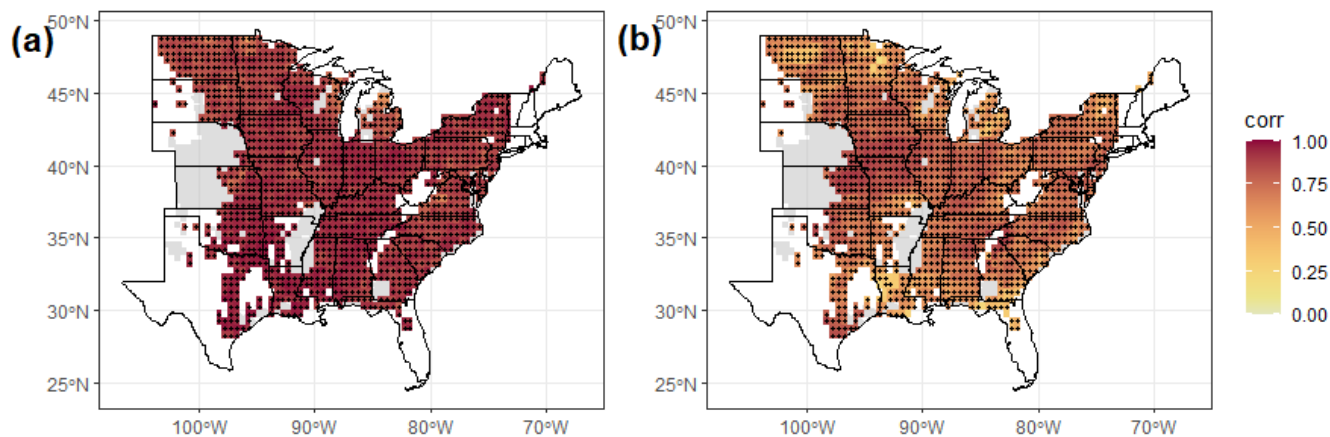

**Figure S 2. Correlation plot between CRU number of wet days and WFDE5 number of days with precipitation above 20mm over the study period (1982-2016). (b) Correlation plot between CRU JJAS precipitation average and GLEAM August-September average root zone soil moisture over the period of study (1982-2016). Stippling indicates statistical significance at the 95% confidence level.**

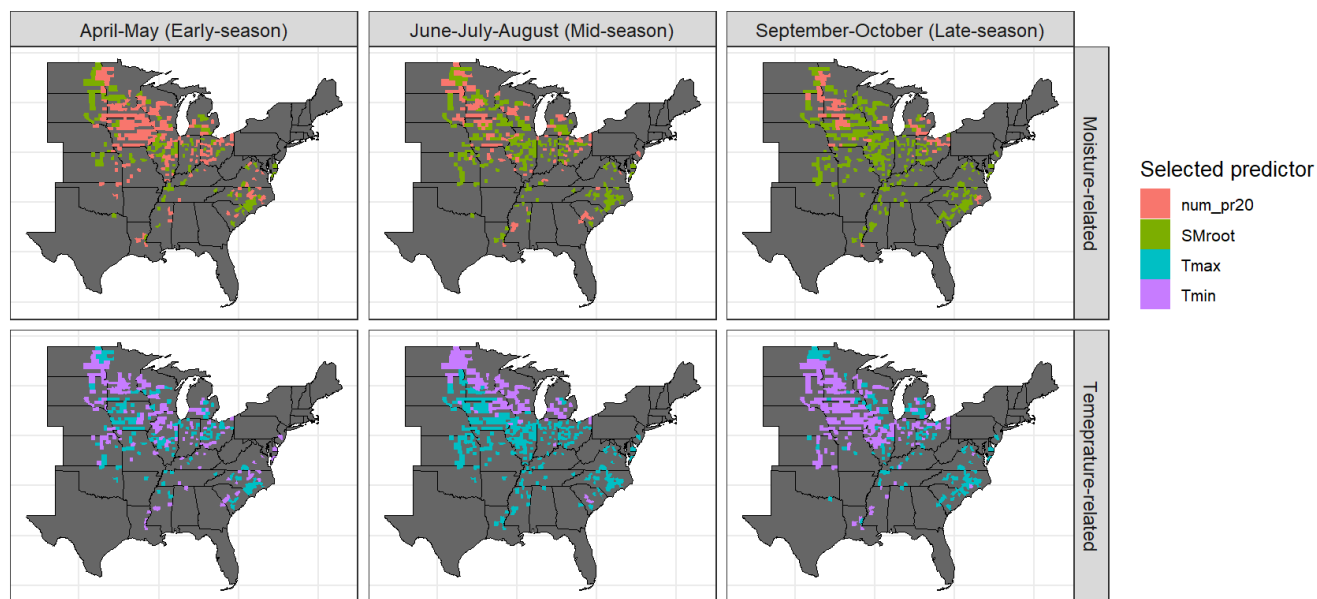

**Figure S 3. Most frequently selected predictors via LOOCV-2.**

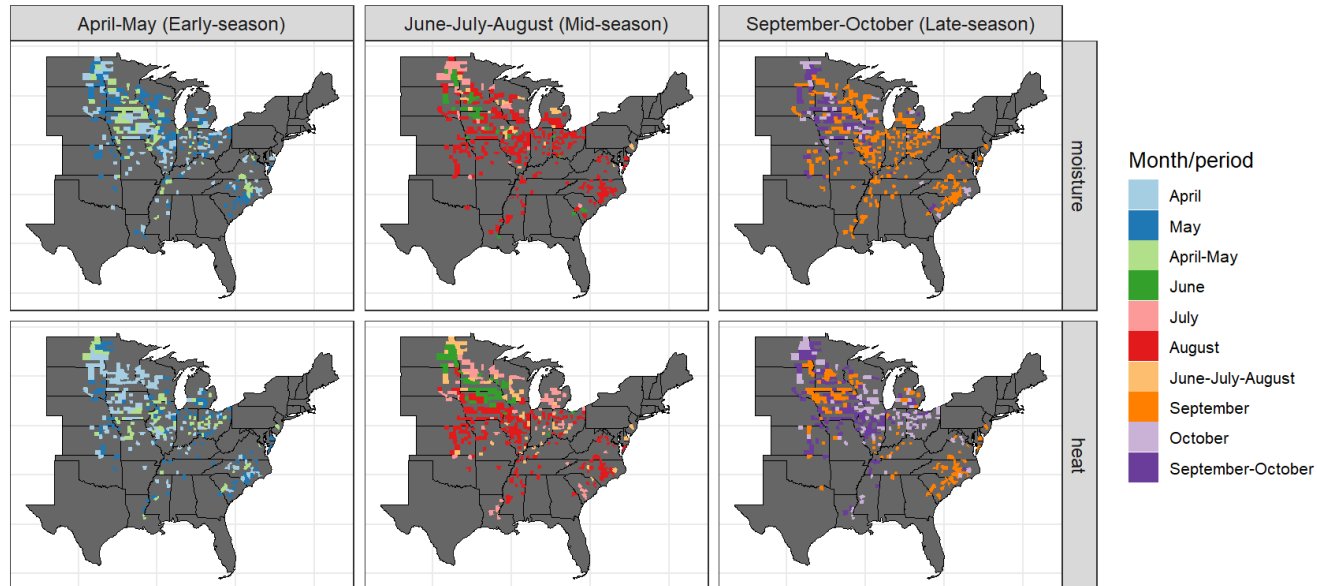

**Figure S 4. Most frequently selected timing via LOOCV-2.**

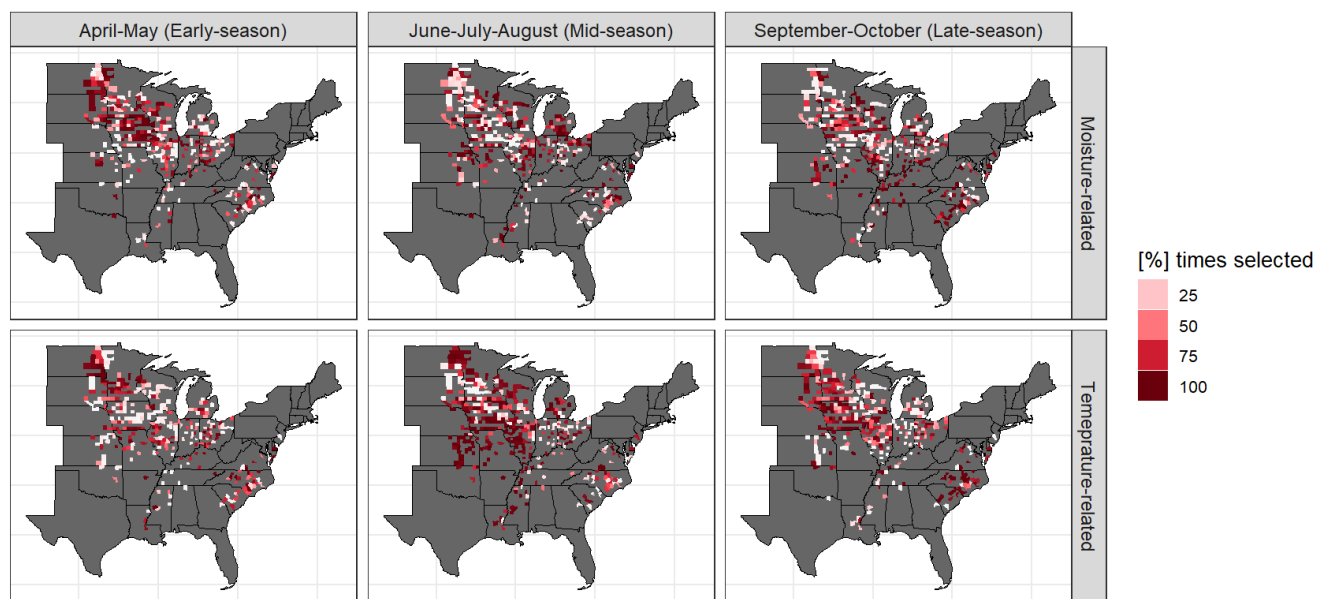

**Figure S 5. Frequency of the most selected predictor and timing via LOOCV-2.**
